# Supplementary material for: Electroactuation with single charge carrier ionomers: the roles of electrostatic pressure and steric strain
Source: Royal Society of Chemistry journal article supplement (doi:10.1039/c2sm27162a), 2013-01-01
Supplement: c2sm27162a.pdf [file c2sm27162a.pdf]

Supplementary information to the article:

# Electroactuation with Single Charge Carrier Ionomers: The Roles of Electrostatic Pressure and Steric Strain

Alpha A Lee, Ralph H Colby, Alexei A Kornyshev

## A Derivation of the transcendental equation for curvature

Following from the free energy functional, the curvature  $\kappa$  can be written as Eq.13. Deriving our simple analytical result from Eq.13 is not straightforward and we outline that progression here for the interested reader.

$$\begin{aligned} \kappa \approx & -\frac{3}{2} \frac{\mathcal{S}}{\mathcal{S}_0} \frac{l_D}{Eh^2} \left( \int_0^H dX \left\{ kTc_0 \left[ \frac{1}{2} \left( \frac{du}{dX} \right)^2 - \frac{d}{dX} \left( u \frac{du}{dX} \right) \right] - K\nu\rho \right\} \right. \\ & \left. - \int_{-H}^0 dX \left\{ k_B T c_0 \left[ \frac{1}{2} \left( \frac{du}{dX} \right)^2 - \frac{d}{dX} \left( u \frac{du}{dX} \right) \right] - K\nu\rho \right\} \right). \end{aligned} \quad (\text{S1})$$

The integral (S 1) can be considerably simplified. In fact, the first term in the integral can be rewritten as

$$\begin{aligned} \int dX \left( \frac{du}{dX} \right)^2 &= \int dX \left( \frac{dy}{dX} + p\kappa l_D \right)^2 \\ &= \int dy \frac{dX}{dy} \left[ \left( \frac{dy}{dX} \right)^2 + 2p\kappa l_D \frac{dy}{dX} + (p\kappa l_D)^2 \right] \end{aligned} \quad (\text{S2})$$

$$= \int dy \frac{dy}{dX} + \int dX (p\kappa l_D)^2 + \int dy 2p\kappa l_D \quad (\text{S3})$$

Combining the integral for positive  $X$  and negative  $X$ ,

$$\begin{aligned}
 \int_0^H dX \left( \frac{du}{dX} \right)^2 - \int_{-H}^0 dX \left( \frac{du}{dX} \right)^2 &= \int_0^{V_1 - p\kappa H} dy \frac{dy}{dX} - \int_{-V_2 + p\kappa H}^0 dy \frac{dy}{dX} \\
 &\quad + 2p\kappa l_D (V_1 - V_2) \\
 &= \int_0^{V_1 - p\kappa H} dy \sqrt{2 \left[ y + \frac{1}{\gamma} \ln(1 - \gamma + \gamma e^{-y}) \right]} \\
 &\quad - \int_{-V_2 + p\kappa H}^0 dy \sqrt{2 \left[ y + \frac{1}{\gamma} \ln(1 - \gamma + \gamma e^{-y}) \right]} \\
 &\quad + 2p\kappa l_D (V_1 - V_2) \tag{S4}
 \end{aligned}$$

The second terms in the integrals of Eq. 38, with derivatives, can be easily integrated

$$\begin{aligned}
 \int_0^H dX \frac{d}{dX} \left( u \frac{du}{dX} \right) - \int_{-H}^0 dX \frac{d}{dX} \left( u \frac{du}{dX} \right) &= V_1 E(X = H) - V_2 E(X = -H) \\
 &= (V_1 - V_2) E(X = H) \tag{S5}
 \end{aligned}$$

Where  $E(X = H) \equiv du/dX$  is the electric field. The third term in the integral can be evaluated using Gauss law, equalising the surface charge densities of the electrodes with the induction as in ref [1]

$$\begin{aligned}
 \int_0^H dX \rho - \int_{-H}^0 dX \rho &= c_0 \left\{ \sqrt{2 \left[ V_1 - p\kappa H + \frac{1}{\gamma} \ln(1 - \gamma + \gamma e^{-V_1 + p\kappa H}) \right]} \right. \\
 &\quad \left. + \sqrt{2 \left[ -V_2 + p\kappa H + \frac{1}{\gamma} \ln(1 - \gamma + \gamma e^{V_2 - p\kappa H}) \right]} \right\} \tag{S6}
 \end{aligned}$$

## B Large Voltage Asymptotics

To consider the integration of Eq. 15  $\int dy \sqrt{2 \left[ y + \frac{1}{\gamma} \ln(1 - \gamma + \gamma e^{-y}) \right]}$  we expand the integrand in the limit of large positive and negative voltages,

$$\sqrt{2 \left[ y + \frac{1}{\gamma} \ln(1 - \gamma + \gamma e^{-y}) \right]} \approx \begin{cases} \sqrt{2 \left[ y + \frac{1}{\gamma} \ln(1 - \gamma) \right]} & , y \gg 1 \\ \sqrt{2 \left[ \left(1 - \frac{1}{\gamma}\right) y + \frac{1}{\gamma} \ln \gamma \right]} & , y \ll -1 \end{cases} \quad (\text{S7})$$

However, as  $\frac{1}{\gamma} \ln(1 - \gamma)$  and  $\frac{1}{\gamma} \ln \gamma$  are negative quantities, the radicals are undefined when  $|y| \ll 1$  and the large voltage approximations in Eq (S 7) do not hold at low voltages. Hence, the integral must be approximated by combining the linear-response and non-linear approximants with  $y = -\frac{1}{\gamma} \ln(1 - \gamma)$  and  $y = -\frac{1}{1-\gamma} \ln \gamma$  as cutoff for the case of positive  $y$  and negative  $y$  respectively.

For the integral extending to large positive values of  $y$

$$\begin{aligned} & \int_0^{V_1 - p\kappa h} dy \sqrt{2 \left[ y + \frac{1}{\gamma} \ln(1 - \gamma + \gamma e^{-y}) \right]} \\ & \approx \sqrt{1 - \gamma} \int_0^{-\frac{1}{\gamma} \ln(1 - \gamma)} y \, dy + \int_{-\frac{1}{\gamma} \ln(1 - \gamma)}^{V_1 - p\kappa h} dy \sqrt{2 \left[ y + \frac{1}{\gamma} \ln(1 - \gamma) \right]} \\ & = \frac{\sqrt{1 - \gamma}}{2} \left( \frac{1}{\gamma} \ln(1 - \gamma) \right)^2 + \frac{2\sqrt{2}}{3} \left( V_1 - p\kappa h + \frac{1}{\gamma} \ln(1 - \gamma) \right)^{3/2} \end{aligned} \quad (\text{S8})$$

Similarly, for the integral extending to large negative  $y$

$$\begin{aligned} & \int_{-V_2 + p\kappa h}^0 dy \sqrt{2 \left[ y + \frac{1}{\gamma} \ln(1 - \gamma + \gamma e^{-y}) \right]} \\ & \approx \sqrt{1 - \gamma} \int_{\frac{1}{\gamma-1} \ln \gamma}^0 y \, dy + \int_{-V_2 + p\kappa h}^{\frac{1}{\gamma-1} \ln \gamma} dy \sqrt{2 \left[ \left(1 - \frac{1}{\gamma}\right) y + \frac{1}{\gamma} \ln \gamma \right]} \\ & = -\frac{\sqrt{1 - \gamma}}{2} \left( \frac{1}{\gamma - 1} \ln \gamma \right)^2 - \frac{2\sqrt{2}}{3} \frac{1}{1 - \frac{1}{\gamma}} \left( \left(1 - \frac{1}{\gamma}\right) (-V_2 + p\kappa h) + \frac{1}{\gamma} \ln \gamma \right)^{3/2} \end{aligned} \quad (\text{S9})$$

All in all,

$$\begin{aligned}
 & \int_0^{V_1 - p\kappa h} dy \sqrt{2 \left[ y + \frac{1}{\gamma} \ln(1 - \gamma + \gamma e^{-y}) \right]} - \int_{-V_2 + p\kappa h}^0 dy \sqrt{2 \left[ y + \frac{1}{\gamma} \ln(1 - \gamma + \gamma e^{-y}) \right]} \\
 & \approx \frac{2\sqrt{2}}{3} \left( V_1 - p\kappa h + \frac{1}{\gamma} \ln(1 - \gamma) \right)^{3/2} + \frac{2\sqrt{2}}{3} \frac{1}{1 - \frac{1}{\gamma}} \left[ \left( 1 - \frac{1}{\gamma} \right) (-V_2 + p\kappa h) + \frac{1}{\gamma} \ln \gamma \right]^{3/2} \\
 & \quad + \frac{\sqrt{1 - \gamma}}{2} \left( \frac{1}{\gamma} \ln(1 - \gamma) \right)^2 + \frac{\sqrt{1 - \gamma}}{2} \left( \frac{1}{\gamma - 1} \ln \gamma \right)^2 \\
 & \sim \frac{\sqrt{8}}{3} \left[ [(1 - \gamma)V]^{3/2} + \frac{1}{1 - \frac{1}{\gamma}} \left[ - \left( 1 - \frac{1}{\gamma} \right) \gamma V \right]^{3/2} \right] \\
 & = \frac{\sqrt{8}}{3} (1 - 2\gamma) \sqrt{1 - \gamma} V^{3/2}
 \end{aligned}
 \tag{S10}$$

Thus the integral  $\int dy \sqrt{2 \left[ y + \frac{1}{\gamma} \ln(1 - \gamma + \gamma e^{-y}) \right]}$  scales as  $\sim V^{3/2}$ .

## References

- [1] A.A. Lee, R.H. Colby, and A.A. Kornyshev. *Electroactuation with Single Charge Carrier Ionomers*. arXiv:1212.2148, 2012.
